# Supplementary material for: Mg-supplementation attenuated lipogenic and oxidative/nitrosative gene expression caused by Combination Antiretroviral Therapy (cART) in HIV-1-transgenic rats
Source: PubMed Central journal article supplement (PMC6342322; doi:10.1371/journal.pone.0210107), 2019-01-22
Supplement: pone.0210107.s002.pdf [file pone.0210107.s002.pdf]

## **S2-Table: Individual data sets for Fig 1-4 and Oxidative/nitrosative stress indices**

**Fig 1: Individual PCR data for SREBP1 expression (Relative to Control –normal Mg)**

| <u>Normal Mg diet</u> |              |           |                | <u>High Mg diet</u> |              |           |                |
|-----------------------|--------------|-----------|----------------|---------------------|--------------|-----------|----------------|
| <u>Ctl</u>            | <u>+cART</u> | <u>Tg</u> | <u>Tg+cART</u> | <u>Ctl</u>          | <u>+cART</u> | <u>Tg</u> | <u>Tg+cART</u> |
| 1.21                  | 1.65         | 4.0       | 6.2            | 1.4                 | 1.29         | 1.2       | 1.3            |
| 1.18                  | 1.52         | 2.6       | 5.1            | 1.2                 | 1.16         | 1.0       | 0.9            |
| 0.85                  | 1.25         | 2.2       | 3.9            | 0.96                | 1.05         | 0.6       | 0.5            |
| 0.76                  | 1.18         | 2.0       | 3.7            | 0.8                 | .79          | 0.4       | 0.3            |
|                       | 1.07         | 1.8       | 2.8            |                     | .76          |           | 0.2            |

**Fig 2 Individual lipid data for Triglyceride and Cholesterol levels (mg/dL)**

| <u>Normal Mg diet Triglyceride</u> |              |           |                | <u>High Mg diet Triglyceride</u> |              |           |                |
|------------------------------------|--------------|-----------|----------------|----------------------------------|--------------|-----------|----------------|
| <u>Ctl</u>                         | <u>+cART</u> | <u>Tg</u> | <u>Tg+cART</u> | <u>Ctl</u>                       | <u>+cART</u> | <u>Tg</u> | <u>Tg+cART</u> |
| 72                                 | 82           | 89        | 104            | 71                               | 81           | 81        | 88             |
| 65                                 | 76           | 88        | 99             | 69                               | 72           | 75        | 69             |
| 59                                 | 64           | 71        | 92             | 51                               | 59           | 68        | 65             |
| 52                                 | 60           | 79        | 85             | 49                               | 61           | 61        | 75             |
|                                    | 58           | 70        | 82             |                                  | 56           | 55        | 54             |

| <u>Normal Mg diet Cholesterol</u> |              |           |                | <u>High Mg diet Cholesterol</u> |              |           |                |
|-----------------------------------|--------------|-----------|----------------|---------------------------------|--------------|-----------|----------------|
| <u>Ctl</u>                        | <u>+cART</u> | <u>Tg</u> | <u>Tg+cART</u> | <u>Ctl</u>                      | <u>+cART</u> | <u>Tg</u> | <u>Tg+cART</u> |
| 79                                | 95           | 94        | 119            | 82                              | 94           | 88        | 90             |
| 76                                | 88           | 89        | 116            | 79                              | 88           | 77        | 93             |
| 61                                | 71           | 83        | 106            | 71                              | 74           | 68        | 72             |
| 59                                | 63           | 70        | 98             | 61                              | 60           | 61        | 69             |
|                                   |              | 68        | 95             | 58                              | 57           | 53        |                |

**Fig 3: (A) PCR data for Nrf2 expression (Relative to Control-normal Mg)**

| <u>Normal Mg diet</u> |              |           |                | <u>High Mg diet</u> |              |           |                |
|-----------------------|--------------|-----------|----------------|---------------------|--------------|-----------|----------------|
| <u>Ctl</u>            | <u>+cART</u> | <u>Tg</u> | <u>Tg+cART</u> | <u>Ctl</u>          | <u>+cART</u> | <u>Tg</u> | <u>Tg+cART</u> |
| 1.1                   | 1.16         | 0.67      | 0.3            | 1.28                | 2.4          | 3.8       | 1.7            |
| 1.07                  | 0.98         | 0.63      | 0.27           | 1.16                | 2.2          | 2.9       | 1.3            |
| 0.95                  | 0.82         | 0.45      | 0.19           | 0.92                | 1.8          | 2.2       | 0.9            |
| 0.88                  | 0.7          | 0.41      | 0.16           | 0.86                | 1.6          | 1.4       | 0.5            |
|                       | 0.6          |           |                |                     | 1.3          | 1.2       | 0.4            |

**(B) PCR data for HmOX-1 expression (Relative to Control-normal Mg)**

| <u>Normal Mg diet</u> |              |           |                | <u>High Mg diet</u> |              |           |                |
|-----------------------|--------------|-----------|----------------|---------------------|--------------|-----------|----------------|
| <u>Ctl</u>            | <u>+cART</u> | <u>Tg</u> | <u>Tg+cART</u> | <u>Ctl</u>          | <u>+cART</u> | <u>Tg</u> | <u>Tg+cART</u> |
| 1                     | 1.1          | 5.1       | 2.1            | 1.45                | 1.01         | 0.8       | 1.4            |
| 1.13                  | 0.8          | 4.8       | 1.1            | 1.35                | 0.72         | 1.4       | 1.6            |
| 0.87                  | 1.33         | 3.7       | 1.4            | 1.2                 | 1.2          | 1.9       | 2.6            |
| 1.0                   | 1.1          | 5.3       |                | 0.9                 | 1.           |           | 2.0            |

**(C) PCR data for GST expression (Relative to Control-normal Mg)**

| <u>Normal Mg diet</u> |              |           |                | <u>High Mg diet</u> |              |           |                |
|-----------------------|--------------|-----------|----------------|---------------------|--------------|-----------|----------------|
| <u>Ctl</u>            | <u>+cART</u> | <u>Tg</u> | <u>Tg+cART</u> | <u>Ctl</u>          | <u>+cART</u> | <u>Tg</u> | <u>Tg+cART</u> |
| 1.3                   | 1.0          | 3.35      | 0.8            | 1.25                | 1.855        | 2.0       | 2.9            |
| 0.8                   | 1.1          | 2.2       | 2.0            | 0.9                 | 1.2          | 1.45      | 2.5            |
| 1.0                   | 1.7          | 3.0       | 0.9            | 0.70                | 0.85         | 2.7       | 2.0            |
| 0.9                   |              |           | 1.7            |                     |              |           | 1.1            |

**Fig 4: PCR data for iNOS and TNF-alpha expression (Relative to Control-normal Mg)**

| Normal Mg diet (iNOS) |              |           |                | High Mg diet (iNOS) |              |           |                |
|-----------------------|--------------|-----------|----------------|---------------------|--------------|-----------|----------------|
| <u>Ctl</u>            | <u>+cART</u> | <u>Tg</u> | <u>Tg+cART</u> | <u>Ctl</u>          | <u>+cART</u> | <u>Tg</u> | <u>Tg+cART</u> |
| 1.29                  | 1.35         | 3.2       | 4.3            | 1.25                | 1.4          | 2.0       | 2.1            |
| 1.15                  | 1.27         | 2.7       | 3.5            | 1.13                | 1.33         | 1.8       | 1.75           |
| 0.82                  | 1.13         | 1.9       | 3.1            | 0.87                | 0.86         | 1.2       | 1.1            |
| 0.72                  | 1.1          | 1.8       | 2.2            | 0.67                | 0.5          | 0.9       | 1.05           |
|                       |              | 2.2       |                |                     |              |           |                |

| Normal Mg diet (TNF-alpha) |              |           |                | High Mg diet (TNF-alpha) |              |           |                |
|----------------------------|--------------|-----------|----------------|--------------------------|--------------|-----------|----------------|
| <u>Ctl</u>                 | <u>+cART</u> | <u>Tg</u> | <u>Tg+cART</u> | <u>Ctl</u>               | <u>+cART</u> | <u>Tg</u> | <u>Tg+cART</u> |
| 1.3                        | 1.85         | 3.9       | 5.8            | 1.39                     | 1.28         | 1.6       | 1.3            |
| 1.15                       | 1.2          | 3.7       | 5.3            | 1.29                     | 1.1          | 1.0       | 1.2            |
| 0.95                       | 1.07         | 2.9       | 3.7            | 1.3                      | 0.8          | 1.5       | 0.67           |
| 0.8                        | 0.98         | 2.2       | 4.3            | 0.9                      | 0.65         | 1.1       | 0.5            |
| 0.75                       |              |           |                | 0.72                     |              |           |                |

## Data sets for S-Table 1 Oxidative and Nitrosative stress Indices

### **(A) 8-Isoprostane levels (pg/ml)**

| <u>Normal Mg diet</u> |              |           |                | <u>High Mg diet</u> |              |           |                |
|-----------------------|--------------|-----------|----------------|---------------------|--------------|-----------|----------------|
| <u>Ctl</u>            | <u>+cART</u> | <u>Tg</u> | <u>Tg+cART</u> | <u>Ctl</u>          | <u>+cART</u> | <u>Tg</u> | <u>Tg+cART</u> |
| 67                    | 86           | 120       | 174            | 67                  | 51           | 102       | 102            |
| 57                    | 77           | 110       | 197            | 60                  | 81           | 61        | 91             |
| 49                    | 69           | 90        | 129            | 39                  | 75           | 71        | 81             |
| 41                    | 63           | 72        | 150            | 45                  | 50           | 88        | 73             |
| 41                    | 55           | 68        | 95             | 40                  | 38           | 68        | 62             |

### **(B) GSSG/Total Glutathione (%)**

| <u>Normal Mg diet</u> |              |           |                | <u>High Mg diet</u> |              |           |                |
|-----------------------|--------------|-----------|----------------|---------------------|--------------|-----------|----------------|
| <u>Ctl</u>            | <u>+cART</u> | <u>Tg</u> | <u>Tg+cART</u> | <u>Ctl</u>          | <u>+cART</u> | <u>Tg</u> | <u>Tg+cART</u> |
| 3.9                   | 4.5          | 6         | 9.8            | 3.9                 | 4.9          | 4.8       | 6.5            |
| 3.5                   | 4.3          | 5.2       | 8.5            | 2.9                 | 4.3          | 4.4       | 5.5            |
| 3.0                   | 3.6          | 4.1       | 7.8            | 2.5                 | 2.9          | 3.8       | 4.6            |
| 2.7                   | 3.7          | 4.5       | 7              | 1.9                 | 1.8          | 3.4       | 3.9            |
| 2.3                   |              | 4.8       | 6.2            | 1.7                 |              | 3.1       | 3.1            |

### **(C) Plasma 3-Nitrotyrosine levels (ng/ml)**

| <u>Normal Mg diet</u> |              |           |                | <u>High Mg diet</u> |              |           |                |
|-----------------------|--------------|-----------|----------------|---------------------|--------------|-----------|----------------|
| <u>Ctl</u>            | <u>+cART</u> | <u>Tg</u> | <u>Tg+cART</u> | <u>Ctl</u>          | <u>+cART</u> | <u>Tg</u> | <u>Tg+cART</u> |
| 1.9                   | 2.8          | 2.6       | 5.1            | 1.3                 | 1.7          | 1.05      | 1.9            |
| 1.8                   | 1.6          | 2.2       | 4.5            | 1.1                 | 1.4          | 1.5       | 1.7            |
| 0.75                  | 1.3          | 1.3       | 3.1            | 0.9                 | 1.0          | 1.02      | 0.9            |
| 0.6                   | 0.7          | 1.2       | 2.5            | 0.7                 | 0.8          | 1.33      | 0.7            |
